# Supplementary material for: Mucocutaneous Manifestations Reported by Inflammatory Bowel Disease Patients in University Hospital
Source: Preprints.org preprint supplement (doi:10.20944/preprints202312.0486.v1), 2023-12-07
Supplement: Supplementary file 1 [file supplementary]

**Table 1.** Demographic and general IBD data.

|                                       | <b>Total</b> | <b>UC</b>   | <b>CD</b>   |
|---------------------------------------|--------------|-------------|-------------|
| <b>Patient count</b>                  | 162 (100 %)  | 117 (72.2%) | 45 (27.8%)  |
| <i>Male</i>                           | 93 (57.4%)   | 67 (57.3%)  | 26 (57.8%)  |
| <i>Female</i>                         | 69 (42.6%)   | 50 (42.7%)  | 19 (42.2%)  |
| <b>Mean age (SD)</b>                  | 42.5 (14.2)  | 43.1 (14)   | 40.9 (14.9) |
| <b>Illness duration in years (SD)</b> | 9 (6.8)      | 9.5 (7.0)   | 7.7 (6.1)   |
| <i>&lt;5 years</i>                    | 46 (28.4%)   | 31 (26.5%)  | 15 (33.3%)  |
| <i>5-10 years</i>                     | 53 (32.7%)   | 35 (29.9%)  | 18 (40%)    |
| <i>&gt;10 years</i>                   | 63 (38.9%)   | 51 (43.6%)  | 12 (26.7%)  |
| <b>Used systemic treatment</b>        | 155 (95.7%)  | 112 (95.7%) | 43 (95.6%)  |
| <b>Biological therapy</b>             | 82 (50.6%)   | 50 (42.7%)  | 32 (71.1%)  |
| <i>Infliximab/adalimumab</i>          | 46 (56.1%)   | 25 (50.0%)  | 21 (65.6%)  |
| <i>Vedolizumab</i>                    | 13 (15.9%)   | 11 (22.0%)  | 2 (6.3%)    |
| <i>Ustekinumab</i>                    | 9 (11.0%)    | 3 (6.0%)    | 6 (18.8%)   |
| <i>Mirikizumab (clinical trial)</i>   | 11 (13.4%)   | 8 (16.0%)   | 3 (9.4%)    |
| <i>Risankizumab (clinical trial)</i>  | 3 (3.7%)     | 3 (6.0%)    | 0 (0.0%)    |
| <b>JAK inhibitors</b>                 | 6 (3.7%)     | 5 (4.27%)   | 1 (2.22%)   |
| <i>Tofacitinib</i>                    | 4 (66.7%)    | 4 (80.0%)   | 0 (0%)      |
| <i>Upadacitinib (clinical trial)</i>  | 2 (33.3%)    | 1 (20.0%)   | 1 (100%)    |

\* IBD – inflammatory bowel disease; UC – ulcerative colitis; CD – Crohn’s disease; SD –standard deviation; JAK inhibitors – a Janus kinase inhibitor.

**Table 2.** The prevalence of skin lesions reported by inflammatory bowel disease patients.

| <b>Skin lesions</b>             | <b>Total<br/>n = 162</b> | <b>Ulcerative colitis<br/>n = 117</b> | <b>Crohn's disease<br/>n = 45</b> |
|---------------------------------|--------------------------|---------------------------------------|-----------------------------------|
| Psoriasis                       | 13 (8,0%)                | 11 (9,4%)                             | 2 (4,4%)                          |
| Erythema nodosum                | 9 (5,6%)                 | 4 (3,4%)                              | 5 (11,1%)                         |
| Pyoderma gangrenosum            | 6 (3,7%)                 | 5 (4,3%)                              | 1 (2,2%)                          |
| Acne                            | 6 (3,7%)                 | 5 (4,3%)                              | 1 (2,2%)                          |
| Vitiligo                        | 3 (1,9%)                 | 3 (2,6%)                              | 0 (0%)                            |
| Epidermolysis bullosa acquisita | 1 (0,6%)                 | 1 (0,9%)                              | 0 (0%)                            |
| Vasculitis                      | 1 (0,6%)                 | 1 (0,9%)                              | 0 (0%)                            |
| Sweet syndrome                  | 0 (0%)                   | 0 (0%)                                | 0 (0%)                            |
| Hidradenitis suppurativa        | 0 (0%)                   | 0 (0%)                                | 0 (0%)                            |
| <i><b>Others:</b></i>           |                          |                                       |                                   |
| Seborrheic dermatitis           | 3 (1,9%)                 | 3 (2,6 %)                             | 0 (0%)                            |
| Atopic dermatitis               | 4 (2,5%)                 | 4 (3,4%)                              | 0 (0%)                            |
| Unspecified dermatitis          | 11 (6,8%)                | 8 (6,8%)                              | 3 (6,7%)                          |
| Others skin lesions             | 17 (10,5%)               | 13 (11,1%)                            | 4 (8,9%)                          |

**Table 3.** The prevalence of skin lesions among different types of Crohn's disease.

| <b>Skin lesions</b>             | <b>Ileitis</b> | <b>Colitis</b> | <b>Ileocolitis</b> |
|---------------------------------|----------------|----------------|--------------------|
| Erythema nodosum                | 1 (5,9%)       | 3 (27,3%)      | 1 (5,9%)           |
| Pyoderma gangrenosum            | 0 (0%)         | 1 (9,1%)       | 0 (0%)             |
| Acne                            | 0 (0%)         | 0 (0%)         | 1 (5,9%)           |
| Psoriasis                       | 0 (0%)         | 0 (0%)         | 2 (11,8%)          |
| Vitiligo                        | 0 (0%)         | 0 (0%)         | 0 (0%)             |
| Epidermolysis bullosa acquisita | 0 (0%)         | 0 (0%)         | 0 (0%)             |
| Vasculitis                      | 0 (0%)         | 0 (0%)         | 0 (0%)             |
| <b><i>Others:</i></b>           |                |                |                    |
| Atopic dermatitis               | 0 (0%)         | 0 (0%)         | 0 (0%)             |
| Seborrheic dermatitis           | 0 (0%)         | 0 (0%)         | 0 (0%)             |
| Unspecified dermatitis          | 1 (5,9%)       | 1 (9,1%)       | 1 (5,9%)           |
| Others skin lesions             | 2 (11,8%)      | 0 (0%)         | 2 (11,8%)          |

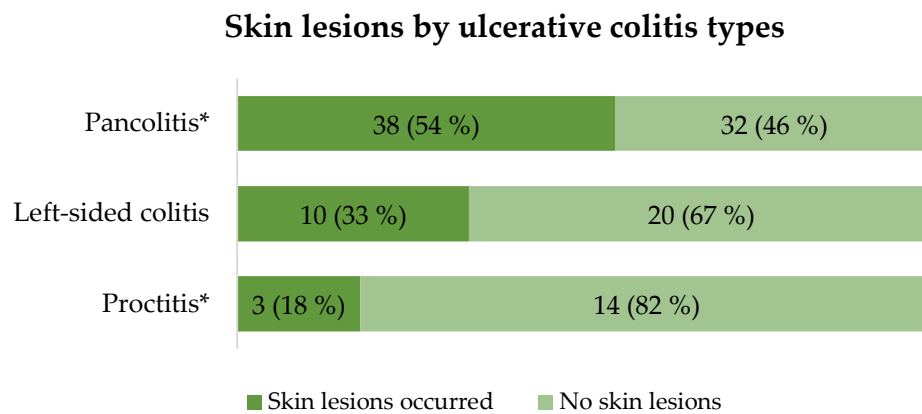

**Figure 1.** Skin lesions distribution between ulcerative colitis types.

\*  $p = 0.01$  between the proctitis and pancolitis groups.

## Skin lesions among different ulcerative colitis types

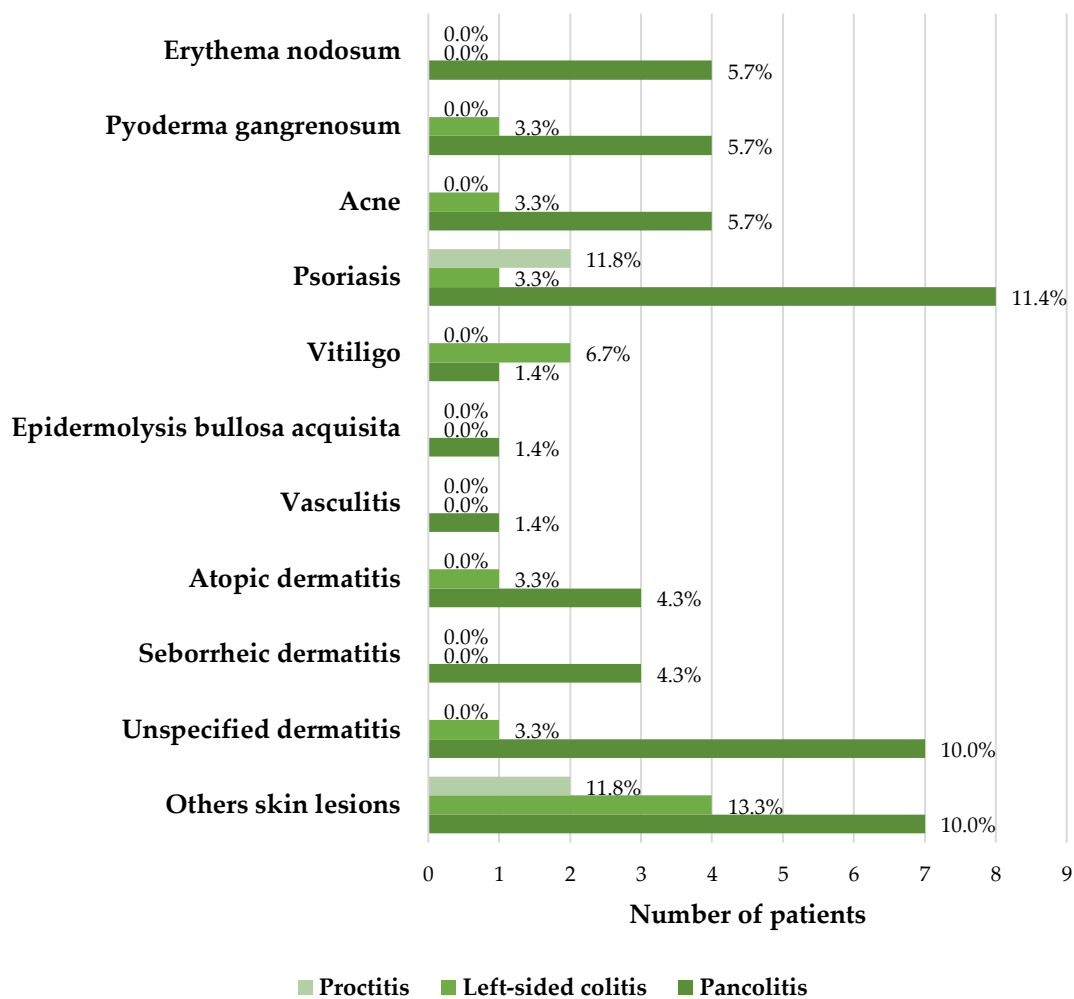

**Figure 2.** The prevalence of skin lesions among different types of ulcerative colitis.

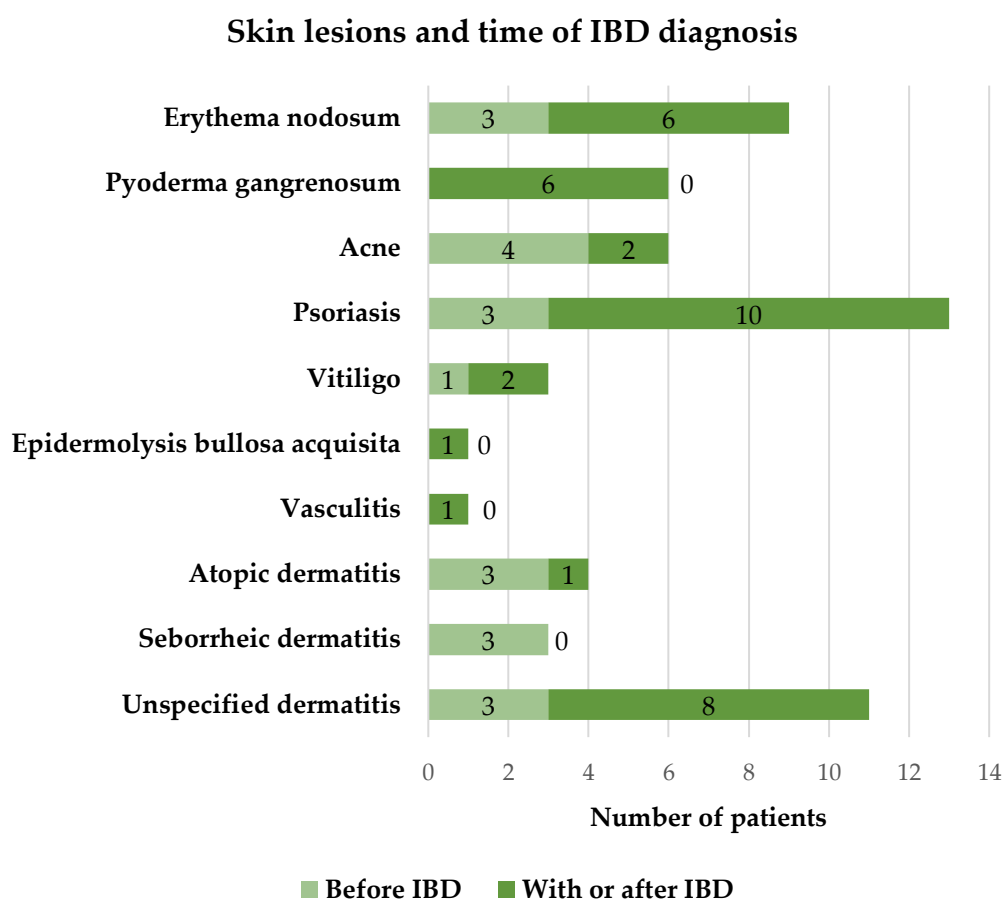

**Figure 3.** The distribution of skin lesions according to the time of their onset.

\* IBD – inflammatory bowel disease.
